# Supplementary material for: Inpatient Burden of Respiratory Syncytial Virus Infection and Influenza in Children Younger than 5 years in Japan, 2011-2022: A database study
Source: bioRxiv or medRxiv preprint supplement (doi:10.1101/2024.08.17.24312160), 2024-08-19
Supplement: Supplementary file [file media-1.pdf]

## Supplementary Material

### Supplementary Methods

#### *RSV and influenza testing in Japan*

In Japan, RSV and influenza tests are covered by national health insurance (NHI) and most healthcare facilities use rapid antigen kit for testing. For RSV testing any of the following groups are covered under NHI: (1) outpatient infants less than 1 year of age, (2) any hospitalized child, or (3) children eligible for palivizumab (note that the test is covered by NHI if any one of these criteria applies). For influenza testing, any outpatient is covered by insurance, regardless of age.

#### *Influenza vaccination coverage and influenza antiviral use in Japan*

Influenza vaccination coverage among children in Japan is approximately 50-60%, which is similar to the United States (U.S.).<sup>1,2</sup> Outpatient antiviral use for influenza is reported to be more common among young children diagnosed for influenza in Japan (approximately 80%) compared to in the U.S. (approximately 40%).<sup>3,4</sup>

#### *Database*

This retrospective cohort study was conducted using data from the Medical Data Vision (MDV) database, one of the largest electronic health records databases in Japan covering approximately 450 hospitals (25% of acute care hospitals in Japan) which includes data for over 40 million people. The MDV database includes detailed data on inpatient and outpatient encounters, drugs prescribed, diagnoses, laboratory tests performed, and medical practice (e.g., date of visit, department visited) from these hospitals.

#### *Definition of seasonality*

Seasons were defined for each year based on the epidemic curves for RSV observed annually between 2011 and 2022 by the NESID. Seasons for 2011 to 2019 were defined as beginning on May 1 of each year and ending on April 30 of the following year. Due to COVID-19 pandemic, May to December for 2020 was defined as a non-epidemic period. Since RSV seasonality was irregular after 2021, 2021 and 2022 seasons were defined as January to December (note: the study period ended on July 31, 2022, so the 2022 season was only half as long as a full season).

#### *Definition of healthy infants*

Since the MDV database may over-represent individuals with comorbidities/prematurity given it is data from acute care hospitals, some analyses were also performed by restricting to a population of “healthy children” who had no claim of the select comorbidities or prematurity (described above) and no palivizumab use.

#### *Data on COVID-19*

We initially included analysis of COVID-19 as part of the study protocol. However, data on COVID-19 were excluded from the analyses as there were very few related hospitalizations (n=14) which may be because hospitalization with COVID-19 was relatively rare during the study period and these patients were concentrated in certain hospitals that had capacity to admit COVID-19 patients (e.g., pediatric COVID-19 ward). It is likely many of these hospitals were not included in the database.

## *References*

1. Ministry of Health Labour and Welfare. About the Seasonal Influenza Vaccine for the 2023/2024 Season. <https://www.mhlw.go.jp/content/10906000/001146456.pdf>. Accessed December 23, 2023. (In Japanese)
2. Centers for Disease Control and Prevention. Flu Vaccination Coverage, United States, 2022–23 Influenza Season. <https://www.cdc.gov/flu/fluview/coverage-2223estimates.htm>. Accessed December 23, 2023.
3. Okubo Y, Uda K, Miyairi I. Trends in Influenza and Related Health Resource Use During 2005–2021 Among Children in Japan. *J Pediatr Infect Dis* 2023;42:648-53.
4. Antoon JW, Sarker J, Abdelaziz A, et al. Trends in outpatient influenza antiviral use among children and adolescents in the United States. *Pediatrics*. 2023;152(6):e2023061960.

**Supplementary Table 1.** Relevant ICD-10 codes for conditions of interest

| Condition                              | ICD-10 codes                                                                                                                                                                                                                                                                      | Detailed description                  |
|----------------------------------------|-----------------------------------------------------------------------------------------------------------------------------------------------------------------------------------------------------------------------------------------------------------------------------------|---------------------------------------|
| <b>Index disease</b>                   |                                                                                                                                                                                                                                                                                   |                                       |
| RSV                                    | J12.1                                                                                                                                                                                                                                                                             | Respiratory syncytial virus pneumonia |
| RSV                                    | J20.5                                                                                                                                                                                                                                                                             | RSV bronchitis                        |
| RSV                                    | J21.0                                                                                                                                                                                                                                                                             | RSV bronchiolitis                     |
| RSV                                    | B34.8                                                                                                                                                                                                                                                                             | RSV infection                         |
| RSV                                    | B97.4                                                                                                                                                                                                                                                                             | RSV bronchitis                        |
| Influenza                              | J09                                                                                                                                                                                                                                                                               | Novel influenza (H1N1)                |
| Influenza                              | J10.1                                                                                                                                                                                                                                                                             | Influenza A/USSR                      |
| Influenza                              | J11.0                                                                                                                                                                                                                                                                             | Influenza pneumonia                   |
| Influenza                              | J11.1                                                                                                                                                                                                                                                                             | Influenza                             |
| <b>Comorbidities of interest</b>       |                                                                                                                                                                                                                                                                                   |                                       |
| Down syndrome                          | Q90.9                                                                                                                                                                                                                                                                             |                                       |
| Asthma                                 | J45.9                                                                                                                                                                                                                                                                             |                                       |
| Bronchitis                             | J40                                                                                                                                                                                                                                                                               |                                       |
| Congenital heart disease               | I27.8, I51.0, Q20.0-5, Q20.8-Q21.4, Q21.8-Q22.6, Q22.8, Q23.0-4, Q23.8-Q24.4, Q24.5, Q24.8-9, Q25.1, Q25.3-Q264, Q26.8, Q26.9                                                                                                                                                     |                                       |
| Bronchopulmonary dysplasia             | P27.1                                                                                                                                                                                                                                                                             |                                       |
| Prematurity                            | P07.3                                                                                                                                                                                                                                                                             |                                       |
| Immunodeficiency                       | D70.0, D71.0, D72.0, D84.9, D80.0-2, D80.4, D80.5, D80.9, D81.0, D81.9, D82.0, D82.1, D82.3, D83.0, D83.9, D84.0, D84.8, D89.1, D89.8, M35.9, Z21.0, Z94.0, Z94.1, Z94.2, Z94.3, Z94.4, Z94.8                                                                                     |                                       |
| Intellectual developmental delay       | F70-F79                                                                                                                                                                                                                                                                           |                                       |
| Children under supportive medical care | Japanese medical segment (kubun) codes: C101-2 – C116                                                                                                                                                                                                                             |                                       |
| Pulmonary hypoplasia                   | Q33.6                                                                                                                                                                                                                                                                             |                                       |
| Airway stenosis                        | J98.8                                                                                                                                                                                                                                                                             |                                       |
| Esophageal atresia                     | Q39.3                                                                                                                                                                                                                                                                             |                                       |
| Congenital metabolic disorders         | D52.8, E55.21, E70.0, E70.1, E70.2, E70.9, E71.0, E71.1, E71.3<br>E72.0, E72.1, E72.2, E72.3, E72.4, E72.9, E73.0, E74.0, E74.2, E74.4, E74.8, E74.9,<br>E75.2, E75.5, E77.0, E77.8, E77.9, E78.0, E78.9, E79.0, E79.8, E83.0, E88.0, E88.8,<br>E88.9, G60.1, G71.3, G90.8. P09.1 |                                       |
| Cystic fibrosis                        | E84.9                                                                                                                                                                                                                                                                             |                                       |
| Neuromuscular disorders                | G10-14, G60, G70-73, G80-83, G90-99                                                                                                                                                                                                                                               |                                       |
| <b>Complications</b>                   |                                                                                                                                                                                                                                                                                   |                                       |
| Pneumonia                              | A40.3, A41.9, A49.1, G00.1, I30.1, J11.0, J12.1, J12.9, J13, J14, J15.1, J15.2, J15.4,<br>J15.6, J15.9, J18.0, J18.1, J18.8, J18.9, J20.2, J69.0, J84.1, J84.9, J85.0, J85.1, J95.8,<br>K65.0, U07.1                                                                              |                                       |
| Otitis media                           | H65.0, H66.4, H66.0, H66.9, H65.1, H65.9, H67.0, H67.1                                                                                                                                                                                                                            |                                       |
| Febrile seizure                        | R56.0                                                                                                                                                                                                                                                                             |                                       |
| Encephalitis or encephalopathy         | G00-G09, G41                                                                                                                                                                                                                                                                      |                                       |

|             |                            |
|-------------|----------------------------|
| Myocarditis | J11.8, I40.0, I40.9, I51.4 |
|-------------|----------------------------|

*\*ICD-10 coding limited to codes used by the Japanese healthcare system to identify the conditions of interest and are covered in the dataset*

**Supplementary Table 2.** Baseline characteristics of all children <5 years of age who were diagnosed in the outpatient setting with RSV infection and influenza

|                                                             | RSV               |                  |                   |                     |                     | Influenza           |                  |                   |                     |                     |
|-------------------------------------------------------------|-------------------|------------------|-------------------|---------------------|---------------------|---------------------|------------------|-------------------|---------------------|---------------------|
|                                                             | Total             | Age <6 months    | Age 6-11 months   | Age 1<2 years       | Age 2<5 years       | Total               | Age <6 months    | Age 6-11 months   | Age 1<2 years       | Age 2<5 years       |
| <b>Total number of patients, n relative % by age group)</b> | 176,911<br>(100)  | 70,021<br>(39.6) | 39,311<br>(22.2)  | 42,485<br>(24.0)    | 25,094<br>(14.2)    | 153,383<br>(100)    | 8,741<br>(5.7)   | 16,295<br>(10.6)  | 39,218<br>(25.6)    | 89,129<br>(58.1)    |
| <b>Sex, n (%)</b>                                           |                   |                  |                   |                     |                     |                     |                  |                   |                     |                     |
| Female                                                      | 79,746<br>(45.1)  | 30,989<br>(44.3) | 17,235<br>(43.8)  | 19,506<br>(45.9)    | 12,016<br>(47.9)    | 70,589<br>(46.0)    | 3,881<br>(44.4)  | 7,476<br>(45.9)   | 18,156<br>(46.3)    | 41,076<br>(46.1)    |
| Male                                                        | 97,165<br>(54.9)  | 39,032<br>(55.7) | 22,076<br>(56.2)  | 22,979<br>(54.1)    | 13,078<br>(52.1)    | 82,794<br>(54.0)    | 4,860<br>(55.6)  | 8,819<br>(54.1)   | 21,062<br>(53.7)    | 48,053<br>(53.9)    |
| <b>Age, months</b>                                          |                   |                  |                   |                     |                     |                     |                  |                   |                     |                     |
| <b>Mean (SD)</b>                                            | 11.8 (11.6)       | 2.5 (1.5)        | 8.3 (1.7)         | 16.6 (3.4)          | 35.0 (9.2)          | 29.8 (16.8)         | 3.1 (1.4)        | 8.8 (1.7)         | 17.1 (3.4)          | 41.9 (10.5)         |
| <b>Median (IQR)</b>                                         | 8.0<br>(3.0-17.0) | 2.0<br>(1.0-4.0) | 8.0<br>(7.0-10.0) | 16.0<br>(14.0-19.0) | 33.0<br>(27.0-41.0) | 28.0<br>(15.0-45.0) | 3.0<br>(2.0-4.0) | 9.0<br>(7.0-10.0) | 17.0<br>(14.0-20.0) | 42.0<br>(33.0-51.0) |
| <b>Season by year, n (%)</b>                                |                   |                  |                   |                     |                     |                     |                  |                   |                     |                     |
| 2011 (May 2011 to April 2012)                               | 4,191<br>(2.4)    | 1,344<br>(1.9)   | 877<br>(2.2)      | 1,199<br>(2.8)      | 771<br>(3.1)        | 8,308<br>(5.5)      | 198<br>(2.3)     | 600<br>(3.7)      | 1,816<br>(4.7)      | 5,694<br>(6.4)      |
| 2012 (May 2012 to April 2013)                               | 8,239<br>(4.7)    | 2,985<br>(4.3)   | 2,052<br>(5.2)    | 2,022<br>(4.8)      | 1,180<br>(4.7)      | 8,619<br>(5.7)      | 312<br>(3.6)     | 721<br>(4.5)      | 1,998<br>(5.1)      | 5,588<br>(6.3)      |
| 2013 (May 2013 to April 2014)                               | 11,285<br>(6.4)   | 4,545<br>(6.5)   | 2,756<br>(7.0)    | 2,559<br>(6.0)      | 1,425<br>(5.7)      | 13,432<br>(8.8)     | 523<br>(6.0)     | 1,224<br>(7.6)    | 3,334<br>(8.5)      | 8,351<br>(9.4)      |
| 2014 (May 2014 to April 2015)                               | 16,909<br>(9.6)   | 6,678<br>(9.5)   | 3,946<br>(10.0)   | 3,958<br>(9.3)      | 2,327<br>(9.3)      | 18,084<br>(11.9)    | 915<br>(10.5)    | 1,754<br>(10.8)   | 4,590<br>(11.8)     | 10,825<br>(12.2)    |
| 2015 (May 2015 to April 2016)                               | 18,853<br>(10.7)  | 7,362<br>(10.5)  | 4,596<br>(11.7)   | 4,433<br>(10.4)     | 2,462<br>(9.8)      | 19,960<br>(13.1)    | 858<br>(9.8)     | 2,061<br>(12.7)   | 5,055<br>(13.0)     | 11,986<br>(13.6)    |
| 2016 (May 2016 to April 2017)                               | 18,242<br>(10.3)  | 7,330<br>(10.5)  | 4,351<br>(11.1)   | 4,318<br>(10.2)     | 2,243<br>(9.0)      | 18,560<br>(12.2)    | 1,096<br>(12.6)  | 2,038<br>(12.6)   | 4,978<br>(12.8)     | 10,448<br>(11.8)    |

|                                                  |                  |                  |                 |                 |                 |                  |                 |                 |                 |                  |
|--------------------------------------------------|------------------|------------------|-----------------|-----------------|-----------------|------------------|-----------------|-----------------|-----------------|------------------|
| 2017 (May 2017 to April 2018)                    | 25,404<br>(14.4) | 9,486<br>(13.6)  | 6,048<br>(15.4) | 6,346<br>(15.0) | 3,524<br>(14.1) | 24,544<br>(16.1) | 1,496<br>(17.2) | 2,785<br>(17.2) | 6,232<br>(16.0) | 14,031<br>(15.9) |
| 2018 (May 2018 to April 2019)                    | 23,143<br>(13.1) | 9,561<br>(13.7)  | 5,315<br>(13.5) | 5,499<br>(13.0) | 2,768<br>(11.0) | 22,129<br>(14.5) | 1,683<br>(19.3) | 2,575<br>(15.9) | 5,706<br>(14.6) | 12,165<br>(13.8) |
| 2019 (May 2019 to April 2020)                    | 20,601<br>(11.7) | 8,311<br>(11.9)  | 4,481<br>(11.4) | 5,172<br>(12.2) | 2,637<br>(10.5) | 16,333<br>(10.7) | 1,255<br>(14.4) | 2,093<br>(12.9) | 4,473<br>(11.5) | 8,512<br>(9.6)   |
| 2020 (May to December)                           | 3,896<br>(2.2)   | 2,583<br>(3.7)   | 679<br>(1.7)    | 475<br>(1.1)    | 159<br>(0.6)    | 411<br>(0.3)     | 70<br>(0.8)     | 78<br>(0.5)     | 173<br>(0.4)    | 90<br>(0.1)      |
| 2021 (January to December)                       | 21,121<br>(12.0) | 7,858<br>(11.2)  | 3,350<br>(8.5)  | 5,363<br>(12.6) | 4,550<br>(18.2) | 1,101<br>(0.7.0) | 171<br>(2.0)    | 160<br>(1.0)    | 441<br>(1.1)    | 329<br>(0.4)     |
| 2022 (January to July)                           | 4,913<br>(2.8)   | 1,946<br>(2.8)   | 838<br>(2.1)    | 1,105<br>(2.6)  | 1,024<br>(4.1)  | 948<br>(0.6)     | 146<br>(1.7)    | 128<br>(0.8)    | 223<br>(0.6)    | 451<br>(0.5)     |
| <b>Comorbidity during baseline period, n (%)</b> |                  |                  |                 |                 |                 |                  |                 |                 |                 |                  |
| Down syndrome                                    | 1,785<br>(1.0)   | 975<br>(1.4)     | 367<br>(0.9)    | 262<br>(0.6)    | 181<br>(0.7)    | 189<br>(0.1)     | 24<br>(0.3)     | 55<br>(0.3)     | 48<br>(0.1)     | 62<br>(0.1)      |
| Congenital heart disease                         | 9,150<br>(5.2)   | 5,717<br>(8.2)   | 2,065<br>(5.3)  | 968<br>(2.3)    | 400<br>(1.6)    | 1,123<br>(0.7)   | 231<br>(2.6)    | 396<br>(2.4)    | 277<br>(0.7)    | 219<br>(0.3)     |
| Bronchopulmonary dysplasia                       | 579<br>(0.3)     | 228<br>(0.3)     | 213<br>(0.5)    | 96<br>(0.2)     | 42<br>(0.2)     | 57<br>(0.0)      | 12<br>(0.1)     | 17<br>(0.1)     | 14<br>(0.0)     | 14<br>(0.0)      |
| Prematurity                                      | 21,686<br>(12.3) | 17,297<br>(24.7) | 3,288<br>(8.4)  | 760<br>(1.8)    | 341<br>(1.4)    | 851<br>(0.6)     | 253<br>(2.9)    | 456<br>(2.8)    | 118<br>(0.3)    | 24<br>(0.0)      |
| Immunodeficiency                                 | 795<br>(0.5)     | 370<br>(0.5)     | 201<br>(0.5)    | 134<br>(0.3)    | 90<br>(0.4)     | 329<br>(0.2)     | 39<br>(0.5)     | 62<br>(0.4)     | 75<br>(0.2)     | 153<br>(0.2)     |
| Pulmonary hypoplasia                             | 78<br>(0.0)      | 43<br>(0.1)      | 22<br>(0.1)     | 9<br>(0.0)      | 4<br>(0.0)      | 13<br>(0.0)      | 3<br>(0.0)      | 7<br>(0.0)      | 1<br>(0.0)      | 2<br>(0.0)       |
| Airway stenosis                                  | 121<br>(0.1)     | 30<br>(0.0)      | 46<br>(0.1)     | 32<br>(0.1)     | 13<br>(0.1)     | 31<br>(0.0)      | 8<br>(0.1)      | 8<br>(0.1)      | 5<br>(0.0)      | 10<br>(0.0)      |
| Esophageal atresia                               | 6<br>(0.0)       | 3<br>(0.0)       | 0<br>(0.0)      | 3<br>(0.0)      | 0<br>(0.0)      | 2<br>(0.0)       | 0<br>(0.0)      | 0<br>(0.0)      | 1<br>(0.0)      | 1<br>(0.0)       |

|                                             |                   |                  |                  |                  |                  |                   |                 |                  |                  |                  |
|---------------------------------------------|-------------------|------------------|------------------|------------------|------------------|-------------------|-----------------|------------------|------------------|------------------|
| Congenital metabolic disorder               | 1,382<br>(0.8)    | 492<br>(0.7)     | 374<br>(1)       | 311<br>(0.7)     | 205<br>(0.8)     | 780<br>(0.5)      | 48<br>(0.6)     | 108<br>(0.7)     | 249<br>(0.6)     | 375<br>(0.4)     |
| Neuromuscular disorder                      | 1,078<br>(0.6)    | 356<br>(0.5)     | 243<br>(0.6)     | 267<br>(0.6)     | 212<br>(0.8)     | 638<br>(0.4)      | 27<br>(0.3)     | 89<br>(0.6)      | 220<br>(0.6)     | 302<br>(0.3)     |
| Cystic fibrosis                             | 0<br>(0.0)        | 0<br>(0.0)       | 0<br>(0.0)       | 0<br>(0.0)       | 0<br>(0.0)       | 0<br>(0.0)        | 0<br>(0.0)      | 0<br>(0.0)       | 0<br>(0.0)       | 0<br>(0.0)       |
| No record of these comorbidities            | 144,611<br>(81.7) | 47,061<br>(67.2) | 33,654<br>(85.6) | 40,077<br>(94.3) | 23,819<br>(94.9) | 149,947<br>(97.8) | 8,203<br>(93.8) | 15,318<br>(94.0) | 38,329<br>(97.7) | 88,097<br>(98.8) |
| <b>Palivizumab use, n (%)</b>               |                   |                  |                  |                  |                  |                   |                 |                  |                  |                  |
| Yes                                         | 16,940<br>(9.6)   | 12,356<br>(17.7) | 3,265<br>(8.3)   | 1,172<br>(2.8)   | 147<br>(0.6)     | 1,131<br>(0.7)    | 146<br>(1.7)    | 404<br>(2.5)     | 487<br>(1.2)     | 94<br>(0.1)      |
| No record of use                            | 159,971<br>(90.4) | 57,665<br>(82.4) | 36,046<br>(91.7) | 41,313<br>(97.2) | 24,947<br>(99.4) | 152,252<br>(99.3) | 8,595<br>(98.3) | 15,891<br>(97.5) | 38,731<br>(98.8) | 89,035<br>(99.9) |
| <b>Size of healthcare facilities, n (%)</b> |                   |                  |                  |                  |                  |                   |                 |                  |                  |                  |
| Less than 200 beds                          | 13,135<br>(7.4)   | 4,296<br>(6.1)   | 3,327<br>(8.5)   | 3,462<br>(8.2)   | 2,050<br>(8.2)   | 14,403<br>(9.4)   | 412<br>(4.7)    | 1,310<br>(8.0)   | 3,599<br>(9.2)   | 9,082<br>(10.2)  |
| 200 to 499 beds                             | 97,448<br>(55.1)  | 35,523<br>(50.7) | 23,038<br>(58.6) | 24,579<br>(57.9) | 14,308<br>(57.0) | 95,370<br>(62.2)  | 4,694<br>(53.7) | 9,971<br>(61.2)  | 24,243<br>(61.8) | 56,462<br>(63.4) |
| 500 or more beds                            | 66,328<br>(37.5)  | 30,202<br>(43.1) | 12,946<br>(32.9) | 14,444<br>(34.0) | 8,736<br>(34.8)  | 43,610<br>(28.4)  | 3,635<br>(41.6) | 5,014<br>(30.8)  | 11,376<br>(29.0) | 23,585<br>(26.5) |

*Rounding may create totals slightly over or below 100% in some cases.*

**Supplementary Table 3** Baseline characteristics of healthy children <5 years of age who were diagnosed in the outpatient setting with RSV infection and influenza

|                                                              | RSV                |                  |                   |                     |                     | Influenza           |                  |                   |                     |                     |
|--------------------------------------------------------------|--------------------|------------------|-------------------|---------------------|---------------------|---------------------|------------------|-------------------|---------------------|---------------------|
|                                                              | Total              | Age <6 months    | Age 6-11 months   | Age 1<2 years       | Age 2<5 years       | Total               | Age <6 months    | Age 6-11 months   | Age 1<2 years       | Age 2<5 years       |
| <b>Total number of patients, n (relative % by age group)</b> | 141,843<br>(100)   | 45,318<br>(31.9) | 33,225<br>(23.4)  | 39,545<br>(27.9)    | 23,755<br>(16.7)    | 149,529<br>(100)    | 8,197<br>(5.5)   | 15,277<br>(10.2)  | 38,019<br>(25.4)    | 88,036<br>(58.9)    |
| <b>Sex, n (%)</b>                                            |                    |                  |                   |                     |                     |                     |                  |                   |                     |                     |
| Female                                                       | 63,794<br>(45.0)   | 19,792<br>(43.7) | 14,462<br>(43.5)  | 18,158<br>(45.9)    | 11,382<br>(47.9)    | 68,883<br>(46.1)    | 3,643<br>(44.4)  | 7,016<br>(45.9)   | 17,600<br>(46.3)    | 40,624<br>(46.1)    |
| Male                                                         | 78,049<br>(55.0)   | 25,526<br>(56.3) | 18,763<br>(56.5)  | 21,387<br>(54.1)    | 12,373<br>(52.1)    | 80,646<br>(53.9)    | 4,554<br>(55.6)  | 8,261<br>(54.1)   | 20,419<br>(53.7)    | 47,412<br>(53.9)    |
| <b>Age, months</b>                                           |                    |                  |                   |                     |                     |                     |                  |                   |                     |                     |
| <b>Mean (SD)</b>                                             | 13.3 (11.9)        | 2.7 (1.4)        | 8.4 (1.7)         | 16.6 (3.4)          | 35.0 (9.2)          | 30.1 (16.7)         | 3.1 (1.4)        | 8.8 (1.7)         | 17.1 (3.4)          | 41.9 (10.5)         |
| <b>Median (IQR)</b>                                          | 10.0<br>(4.0-19.0) | 3.0<br>(2.0-4.0) | 8.0<br>(7.0-10.0) | 16.0<br>(14.0-19.0) | 33.0<br>(27.0-41.0) | 29.0<br>(15.0-45.0) | 3.0<br>(2.0-4.0) | 9.0<br>(7.0-10.0) | 17.0<br>(14.0-20.0) | 42.0<br>(33.0-51.0) |
| <b>Season by year, n (%)</b>                                 |                    |                  |                   |                     |                     |                     |                  |                   |                     |                     |
| 2011 (May 2011 to April 2012)                                | 3,671<br>(2.6)     | 1,063<br>(2.3)   | 801<br>(2.4)      | 1,101<br>(2.8)      | 706<br>(3.0)        | 8,198<br>(5.5)      | 191<br>(2.3)     | 571<br>(3.8)      | 1,785<br>(4.7)      | 5,651<br>(6.5)      |
| 2012 (May 2012 to April 2013)                                | 6,880<br>(4.9)     | 2,224<br>(4.9)   | 1,722<br>(5.2)    | 1,839<br>(4.7)      | 1,095<br>(4.6)      | 8,474<br>(5.7)      | 300<br>(3.7)     | 689<br>(4.5)      | 1,957<br>(5.2)      | 5,528<br>(6.3)      |
| 2013 (May 2013 to April 2014)                                | 8,962<br>(6.3)     | 3,161<br>(7.0)   | 2,199<br>(6.6)    | 2,290<br>(5.8)      | 1,312<br>(5.5)      | 13,133<br>(8.8)     | 496<br>(6.1)     | 1,133<br>(7.5)    | 3,255<br>(8.6)      | 8,249<br>(9.4)      |
| 2014 (May 2014 to April 2015)                                | 13,808<br>(9.7)    | 4,610<br>(10.2)  | 3,385<br>(10.2)   | 3,662<br>(9.3)      | 2,151<br>(9.1)      | 17,659<br>(11.9)    | 860<br>(10.5)    | 1,652<br>(10.9)   | 4,452<br>(11.8)     | 10,695<br>(12.2)    |
| 2015 (May 2015 to April 2016)                                | 15,391<br>(10.9)   | 5,114<br>(11.3)  | 3,881<br>(11.7)   | 4,128<br>(10.4)     | 2,268<br>(9.6)      | 19,475<br>(13.1)    | 803<br>(9.8)     | 1,923<br>(12.7)   | 4,908<br>(13.0)     | 11,841<br>(13.6)    |
| 2016 (May 2016 to April 2017)                                | 14,698<br>(10.4)   | 4,917<br>(10.9)  | 3,672<br>(11.1)   | 4,016<br>(10.2)     | 2,093<br>(8.8)      | 18,068<br>(12.2)    | 1,032<br>(12.6)  | 1,892<br>(12.4)   | 4,819<br>(12.7)     | 10,325<br>(11.8)    |



|                                             |                  |                  |                  |                  |                  |                  |                 |                 |                  |                  |
|---------------------------------------------|------------------|------------------|------------------|------------------|------------------|------------------|-----------------|-----------------|------------------|------------------|
| 2017 (May 2017 to April 2018)               | 21,058<br>(14.9) | 6,623<br>(14.6)  | 5,240<br>(15.8)  | 5,862<br>(14.8)  | 3,333<br>(14.0)  | 23,843<br>(16.0) | 1,389<br>(17.0) | 2,613<br>(17.2) | 5,999<br>(15.9)  | 13,842<br>(15.8) |
| 2018 (May 2018 to April 2019)               | 18,823<br>(13.3) | 6,395<br>(14.1)  | 4,602<br>(13.9)  | 5,174<br>(13.1)  | 2,652<br>(11.2)  | 21,540<br>(14.5) | 1,566<br>(19.1) | 2,431<br>(16.0) | 5,529<br>(14.6)  | 12,014<br>(13.7) |
| 2019 (May 2019 to April 2020)               | 16,484<br>(11.6) | 5,130<br>(11.3)  | 3,916<br>(11.8)  | 4,888<br>(12.4)  | 2,550<br>(10.7)  | 15,880<br>(10.7) | 1,182<br>(14.4) | 1,966<br>(12.9) | 4,322<br>(11.4)  | 8,410<br>(9.6)   |
| 2020 (May to December)                      | 1,162<br>(0.8)   | 363<br>(0.8)     | 280<br>(0.8)     | 376<br>(1.0)     | 143<br>(0.6)     | 376<br>(0.3)     | 59<br>(0.7)     | 66<br>(0.4)     | 168<br>(0.4)     | 83<br>(0.1)      |
| 2021 (January to December)                  | 17,211<br>(12.1) | 4,782<br>(10.6)  | 2,868<br>(8.6)   | 5,132<br>(13.0)  | 4,429<br>(18.7)  | 1,026<br>(0.7)   | 162<br>(2.0)    | 143<br>(0.9)    | 413<br>(1.1)     | 308<br>(0.4)     |
| 2022 (January to July)                      | 3,587<br>(2.5)   | 906<br>(2.0)     | 638<br>(1.9)     | 1,043<br>(2.6)   | 1,000<br>(4.2)   | 912<br>(0.6)     | 140<br>(1.7)    | 122<br>(0.8)    | 214<br>(0.6)     | 436<br>(0.5)     |
| <b>Size of healthcare facilities, n (%)</b> |                  |                  |                  |                  |                  |                  |                 |                 |                  |                  |
| Less than 200 beds                          | 11,318<br>(8.0)  | 3,069<br>(6.8)   | 2,951<br>(8.9)   | 3,312<br>(8.4)   | 1,986<br>(8.4)   | 14,273<br>(9.5)  | 401<br>(4.9)    | 1,281<br>(8.4)  | 3,555<br>(9.4)   | 9,036<br>(10.3)  |
| 200 to 499 beds                             | 83,300<br>(58.7) | 25,757<br>(56.8) | 20,393<br>(61.4) | 23,359<br>(59.1) | 13,791<br>(58.1) | 93,555<br>(62.6) | 4,447<br>(54.3) | 9,467<br>(62.0) | 23,700<br>(62.3) | 55,941<br>(63.5) |
| 500 or more beds                            | 47,225<br>(33.3) | 16,492<br>(36.4) | 9,881<br>(29.7)  | 12,874<br>(32.6) | 7,978<br>(33.6)  | 41,701<br>(27.9) | 3,349<br>(40.9) | 4,529<br>(29.6) | 10,764<br>(28.3) | 23,059<br>(26.2) |

*Rounding may create totals slightly over or below 100% in some cases.*

**Supplementary Table 4.** Baseline characteristics for healthy children hospitalized with RSV infection and influenza overall and by age categories

|                                                              | RSV               |                  |                   |                     |                     | Influenza          |                  |                   |                     |                     |
|--------------------------------------------------------------|-------------------|------------------|-------------------|---------------------|---------------------|--------------------|------------------|-------------------|---------------------|---------------------|
|                                                              | Total             | Age <6 months    | Age 6-11 months   | Age 1<2 years       | Age 2<5 years       | Total              | Age <6 months    | Age 6-11 months   | Age 1<2 years       | Age 2<5 years       |
| <b>Total number of patients, n (relative % by age group)</b> | 85,550<br>(100)   | 32,909<br>(38.5) | 17,618<br>(20.6)  | 23,046<br>(26.9)    | 11,977<br>(14.0)    | 10,764<br>(100)    | 2,064<br>(19.2)  | 1,100<br>(10.2)   | 2,728<br>(25.3)     | 4,872<br>(45.3)     |
| <b>Sex, n (%)</b>                                            |                   |                  |                   |                     |                     |                    |                  |                   |                     |                     |
| Female                                                       | 38,766<br>(45.3)  | 14,508<br>(44.1) | 7,489<br>(42.5)   | 10,741<br>(46.6)    | 6,028<br>(50.3)     | 4,696<br>(43.6)    | 952<br>(46.1)    | 478<br>(43.5)     | 1,228<br>(45.0)     | 2,038<br>(41.8)     |
| Male                                                         | 46,784<br>(54.7)  | 18,401<br>(55.9) | 10,129<br>(57.5)  | 12,305<br>(53.4)    | 5,949<br>(49.7)     | 6,068<br>(56.4)    | 1,112<br>(53.9)  | 622<br>(56.5)     | 1,500<br>(55.0)     | 2,834<br>(58.2)     |
| <b>Age, months</b>                                           |                   |                  |                   |                     |                     |                    |                  |                   |                     |                     |
| <b>Mean (SD)</b>                                             | 11.9 (11.2)       | 2.5 (1.4)        | 8.4 (1.7)         | 16.7 (3.4)          | 33.9 (8.6)          | 24.2 (17.4)        | 2.5 (1.3)        | 8.6 (1.7)         | 17.4 (3.4)          | 40.7 (10.6)         |
| <b>Median (IQR)</b>                                          | 9.0<br>(3.0-17.0) | 2.0<br>(1.0-4.0) | 8.0<br>(7.0-10.0) | 16.0<br>(14.0-19.0) | 31.0<br>(27.0-39.0) | 21.0<br>(9.0-38.5) | 2.0<br>(2.0-3.0) | 9.0<br>(7.0-10.0) | 17.0<br>(14.0-20.0) | 40.0<br>(31.0-50.0) |
| <b>Season by year, n (%)</b>                                 |                   |                  |                   |                     |                     |                    |                  |                   |                     |                     |
| 2011 (May 2011 to April 2012)                                | 1,911<br>(2.2)    | 684<br>(2.1)     | 428<br>(2.4)      | 530<br>(2.3)        | 269<br>(2.2)        | 353<br>(3.3)       | 68<br>(3.3)      | 36<br>(3.3)       | 78<br>(2.9)         | 171<br>(3.5)        |
| 2012 (May 2012 to April 2013)                                | 3,448<br>(4.0)    | 1,297<br>(3.9)   | 799<br>(4.5)      | 911<br>(4.0)        | 441<br>(3.7)        | 496<br>(4.6)       | 97<br>(4.7)      | 41<br>(3.7)       | 124<br>(4.6)        | 234<br>(4.8)        |
| 2013 (May 2013 to April 2014)                                | 4,925<br>(5.8)    | 2,105<br>(6.4)   | 1,093<br>(6.2)    | 1,169<br>(5.1)      | 558<br>(4.7)        | 900<br>(8.4)       | 141<br>(6.8)     | 91<br>(8.3)       | 216<br>(7.9)        | 452<br>(9.3)        |
| 2014 (May 2014 to April 2015)                                | 7,587<br>(8.9)    | 2,987<br>(9.1)   | 1,684<br>(9.6)    | 1,961<br>(8.5)      | 955<br>(8.0)        | 1,088<br>(10.1)    | 251<br>(12.2)    | 107<br>(9.8)      | 254<br>(9.3)        | 476<br>(9.8)        |
| 2015 (May 2015 to April 2016)                                | 8,975<br>(10.5)   | 3,565<br>(10.8)  | 1,923<br>(10.9)   | 2,366<br>(10.3)     | 1,121<br>(9.4)      | 1,507<br>(14.0)    | 225<br>(10.9)    | 188<br>(17.1)     | 384<br>(14.1)       | 710<br>(14.6)       |
| 2016 (May 2016 to April 2017)                                | 8,375<br>(9.8)    | 3,343<br>(10.2)  | 1,906<br>(10.8)   | 2,214<br>(9.6)      | 912<br>(7.6)        | 1,334<br>(12.4)    | 293<br>(14.2)    | 119<br>(10.8)     | 337<br>(12.4)       | 585<br>(12.1)       |

|                                             |                  |                  |                  |                  |                 |                 |                 |               |                 |                 |
|---------------------------------------------|------------------|------------------|------------------|------------------|-----------------|-----------------|-----------------|---------------|-----------------|-----------------|
| 2017 (May 2017 to April 2018)               | 12,640<br>(14.8) | 4,763<br>(14.5)  | 2,798<br>(15.9)  | 3,436<br>(14.9)  | 1,643<br>(13.7) | 1,612<br>(15.0) | 292<br>(14.2)   | 162<br>(14.8) | 381<br>(14.0)   | 777<br>(16.0)   |
| 2018 (May 2018 to April 2019)               | 11,639<br>(13.6) | 4,739<br>(14.4)  | 2,556<br>(14.5)  | 3,034<br>(13.2)  | 1,310<br>(10.9) | 1,818<br>(16.9) | 401<br>(19.5)   | 173<br>(15.8) | 469<br>(17.2)   | 775<br>(16.0)   |
| 2019 (May 2019 to April 2020)               | 11,031<br>(12.9) | 4,107<br>(12.5)  | 2,252<br>(12.8)  | 3,217<br>(14.0)  | 1,455<br>(12.2) | 1,608<br>(15.0) | 288<br>(14.0)   | 177<br>(16.1) | 474<br>(17.4)   | 669<br>(13.8)   |
| 2020 (May to December)                      | 711<br>(0.8)     | 239<br>(0.7)     | 151<br>(0.9)     | 231<br>(1.0)     | 90<br>(0.8)     | 3<br>(0.0)      | 1<br>(0.0)      | 2<br>(0.2)    | 0<br>(0.0)      | 0<br>(0.0)      |
| 2021 (January to December)                  | 11,924<br>(13.9) | 4,261<br>(13.0)  | 1,671<br>(9.5)   | 3,341<br>(14.5)  | 2,651<br>(22.1) | 6<br>(0.1)      | 1<br>(0.0)      | 1<br>(0.1)    | 3<br>(0.1)      | 1<br>(0.0)      |
| 2022 (January to July)                      | 2,328<br>(2.7)   | 797<br>(2.4)     | 346<br>(2.0)     | 619<br>(2.7)     | 566<br>(4.7)    | 4<br>(0.0)      | 1<br>(0.0)      | 0<br>(0.0)    | 3<br>(0.1)      | 0<br>(0.0)      |
| <b>Size of healthcare facilities, n (%)</b> |                  |                  |                  |                  |                 |                 |                 |               |                 |                 |
| Less than 200 beds                          | 5,072<br>(5.9)   | 1,700<br>(5.2)   | 1,165<br>(6.6)   | 1,420<br>(6.2)   | 787<br>(6.6)    | 541<br>(5.0)    | 66<br>(3.2)     | 54<br>(4.9)   | 152<br>(5.6)    | 269<br>(5.5)    |
| 200 to 499 beds                             | 48,569<br>(56.8) | 17,932<br>(54.5) | 10,427<br>(59.2) | 13,476<br>(58.5) | 6,734<br>(56.2) | 5,907<br>(54.9) | 1,100<br>(53.3) | 597<br>(54.3) | 1,529<br>(56.0) | 2,681<br>(55.0) |
| 500 or more beds                            | 31,909<br>(37.3) | 13,277<br>(40.3) | 6,026<br>(34.2)  | 8,150<br>(35.4)  | 4,456<br>(37.2) | 4,316<br>(40.1) | 898<br>(43.5)   | 449<br>(40.8) | 1,047<br>(38.4) | 1,922<br>(39.4) |

*Rounding may create totals slightly over or below 100% in some cases.*

**Supplementary Table 5.** Distribution of infants <1 year of age who are diagnosed in the outpatient setting, who are hospitalized, who required oxygen use, or who required mechanical ventilation with RSV infection or influenza in Japan by month of age

| Age (month)                                                                                                       | 0               | 1                | 2                 | 3                | 4                | 5               | 6               | 7               | 8               | 9               | 10              | 11              |
|-------------------------------------------------------------------------------------------------------------------|-----------------|------------------|-------------------|------------------|------------------|-----------------|-----------------|-----------------|-----------------|-----------------|-----------------|-----------------|
|                                                                                                                   | n (%)           | n (%)            | n (%)             | n (%)            | n (%)            | n (%)           | n (%)           | n (%)           | n (%)           | n (%)           | n (%)           | n (%)           |
| <b>RSV infection</b>                                                                                              |                 |                  |                   |                  |                  |                 |                 |                 |                 |                 |                 |                 |
| <b>All children: Total number of patient who are diagnosed in the outpatient setting per age group, n (%)</b>     | 4,311<br>(3.9)  | 15,885<br>(14.5) | 16,961<br>(15.5)  | 12,944<br>(11.8) | 10,884<br>(10.0) | 9,036<br>(8.3)  | 7,830<br>(7.2)  | 7,026<br>(6.4)  | 6,311<br>(5.8)  | 6,149<br>(5.6)  | 5,967<br>(5.5)  | 6,028<br>(5.5)  |
| <b>All children: Total number of hospitalized patients per age group, n (%)</b>                                   | 1,271<br>(2.3)  | 8,223<br>(15.2)  | 9,500<br>(17.6)   | 6,901<br>(12.8)  | 5,230<br>(9.7)   | 4,148<br>(7.7)  | 3,546<br>(6.6)  | 3,362<br>(6.2)  | 2,999<br>(5.5)  | 3,023<br>(5.6)  | 2,940<br>(5.4)  | 2,957<br>(5.5)  |
| <b>All children: Total number of patient who required mechanical ventilation per age group, n (%)</b>             | 71<br>(4.8)     | 454<br>(30.8)    | 326<br>(22.1)     | 131<br>(8.9)     | 94<br>(6.4)      | 79<br>(5.4)     | 55<br>(3.7)     | 60<br>(4.1)     | 52<br>(3.5)     | 54<br>(3.7)     | 50<br>(3.4)     | 46<br>(3.1)     |
| <b>Healthy children: Total number of patient who are diagnosed in the outpatient setting per age group, n (%)</b> |                 |                  |                   |                  |                  |                 |                 |                 |                 |                 |                 |                 |
|                                                                                                                   | 1,379<br>(1.8%) | 9,044<br>(11.5%) | 11,192<br>(14.2%) | 9,200<br>(11.7%) | 7,849<br>(10%)   | 6,654<br>(8.5%) | 5,999<br>(7.6%) | 5,759<br>(7.3%) | 5,389<br>(6.9%) | 5,343<br>(6.8%) | 5,339<br>(6.8%) | 5,396<br>(6.9%) |
| <b>Healthy children: Total number of hospitalized patients per age group, n (%)</b>                               | 1,134<br>(2.2%) | 7,691<br>(15.2%) | 8,894<br>(17.6%)  | 6,500<br>(12.9%) | 4,849<br>(9.6%)  | 3,841<br>(7.6%) | 3,269<br>(6.5%) | 3,152<br>(6.2%) | 2,801<br>(5.5%) | 2,819<br>(5.6%) | 2,801<br>(5.5%) | 2,776<br>(5.5%) |
| <b>Healthy children: Total number of patient who required mechanical ventilation per age group, n (%)</b>         | 62<br>(4.8)     | 419<br>(32.2)    | 291<br>(22.4)     | 121<br>(9.3)     | 83<br>(6.4)      | 57<br>(4.4)     | 45<br>(3.5)     | 50<br>(3.8)     | 42<br>(3.2)     | 46<br>(3.5)     | 44<br>(3.4)     | 42<br>(3.2)     |
| <b>All Children: Overall hospitalizations after diagnosis (n, % of outpatient diagnoses)</b>                      |                 |                  |                   |                  |                  |                 |                 |                 |                 |                 |                 |                 |
| Admissions within 0-6 days                                                                                        | 570<br>(13.2)   | 3,884<br>(24.5)  | 4,477<br>(26.4)   | 3,245<br>(25.1)  | 2,449<br>(22.5)  | 1,935<br>(21.4) | 1,659<br>(21.2) | 1,606<br>(22.9) | 1,416<br>(22.4) | 1,434<br>(23.3) | 1,381<br>(23.1) | 1,407<br>(23.3) |
| Admissions within 0-13 days                                                                                       | 570             | 3,912            | 4,496             | 3,258            | 2,460            | 1,949           | 1,672           | 1,613           | 1,423           | 1,446           | 1,386           | 1,409           |

|                                                                                                                   |               |                 |                 |                 |                 |                 |                 |                 |                  |                  |                  |                  |
|-------------------------------------------------------------------------------------------------------------------|---------------|-----------------|-----------------|-----------------|-----------------|-----------------|-----------------|-----------------|------------------|------------------|------------------|------------------|
|                                                                                                                   | (13.2)        | (24.6)          | (26.5)          | (25.2)          | (22.6)          | (21.6)          | (21.4)          | (23.0)          | (22.5)           | (23.5)           | (23.2)           | (23.4)           |
| Admissions within 0-29 days                                                                                       | 576           | 3,952           | 4,561           | 3,306           | 2,495           | 1,979           | 1,694           | 1,641           | 1,448            | 1,465            | 1,410            | 1,432            |
|                                                                                                                   | (13.4)        | (24.9)          | (26.9)          | (25.5)          | (22.9)          | (21.9)          | (21.6)          | (23.4)          | (22.9)           | (23.8)           | (23.6)           | (23.8)           |
| <b>Healthy Children: Overall hospitalizations after diagnosis</b>                                                 |               |                 |                 |                 |                 |                 |                 |                 |                  |                  |                  |                  |
| <b>(n, % of outpatient diagnoses)</b>                                                                             |               |                 |                 |                 |                 |                 |                 |                 |                  |                  |                  |                  |
| Admissions within 0-6 days                                                                                        | 541           | 3,699           | 4,267           | 3,100           | 2,297           | 1,813           | 1,562           | 1,541           | 1,338            | 1,346            | 1,323            | 1,333            |
|                                                                                                                   | (39.2)        | (40.9)          | (38.1)          | (33.7)          | (29.3)          | (27.2)          | (26.0)          | (26.8)          | (24.8)           | (25.2)           | (24.8)           | (24.7)           |
| Admissions within 0-13 days                                                                                       | 541           | 3,726           | 4,283           | 3,112           | 2,306           | 1,826           | 1,573           | 1,547           | 1,345            | 1,356            | 1,325            | 1,333            |
|                                                                                                                   | (39.2)        | (41.2)          | (38.3)          | (33.8)          | (29.4)          | (27.4)          | (26.2)          | (26.9)          | (25.0)           | (25.4)           | (24.8)           | (24.7)           |
| Admissions within 0-29 days                                                                                       | 545           | 3,754           | 4,331           | 3,156           | 2,336           | 1,848           | 1,593           | 1,573           | 1,368            | 1,374            | 1,348            | 1,354            |
|                                                                                                                   | (39.5)        | (41.5)          | (38.7)          | (34.3)          | (29.8)          | (27.8)          | (26.6)          | (27.3)          | (25.4)           | (25.7)           | (25.2)           | (25.1)           |
| <b>Influenza</b>                                                                                                  |               |                 |                 |                 |                 |                 |                 |                 |                  |                  |                  |                  |
| <b>All children: Total number of patient who are diagnosed in the outpatient setting per age group, n (%)</b>     | 215<br>(0.9)  | 1,178<br>(4.7)  | 1,823<br>(7.3)  | 1,908<br>(7.6)  | 1,816<br>(7.3)  | 1,801<br>(7.2)  | 2,088<br>(8.3)  | 2,315<br>(9.2)  | 2,604<br>(10.4)  | 2,934<br>(11.7)  | 3,121<br>(12.5)  | 3,233<br>(12.9)  |
| <b>All children: Total number of hospitalized patients per age group, n (%)</b>                                   | 53<br>(1.6)   | 405<br>(12.2)   | 655<br>(19.7)   | 519<br>(15.6)   | 327<br>(9.8)    | 182<br>(5.5)    | 193<br>(5.8)    | 168<br>(5.0)    | 184<br>(5.5)     | 206<br>(6.2)     | 222<br>(6.7)     | 215<br>(6.5)     |
| <b>All children: Total number of patient who required mechanical ventilation per age group, n (%)</b>             | 0<br>(0.0)    | 1<br>(7.7)      | 4<br>(30.8)     | 0<br>(0.0)      | 2<br>(15.4)     | 1<br>(7.7)      | 0<br>(0.0)      | 2<br>(15.4)     | 0<br>(0.0)       | 1<br>(7.7)       | 1<br>(7.7)       | 1<br>(7.7)       |
| <b>Healthy children: Total number of patient who are diagnosed in the outpatient setting per age group, n (%)</b> | 192<br>(0.8%) | 1,086<br>(4.6%) | 1,723<br>(7.3%) | 1,810<br>(7.7%) | 1,708<br>(7.3%) | 1,678<br>(7.1%) | 1,949<br>(8.3%) | 2,174<br>(9.3%) | 2,443<br>(10.4%) | 2,739<br>(11.7%) | 2,944<br>(12.5%) | 3,028<br>(12.9%) |
| <b>Healthy children: Total number of hospitalized patients per age group, n (%)</b>                               | 51<br>(1.6%)  | 394<br>(12.5%)  | 637<br>(20.1%)  | 500<br>(15.8%)  | 315<br>(10%)    | 167<br>(5.3%)   | 183<br>(5.8%)   | 153<br>(4.8%)   | 174<br>(5.5%)    | 189<br>(6%)      | 202<br>(6.4%)    | 199<br>(6.3%)    |
| <b>Healthy children: Total number of patient who required mechanical ventilation per age group, n (%)</b>         | 0<br>(0%)     | 1<br>(14.3%)    | 3<br>(42.9%)    | 0<br>(0%)       | 0<br>(0%)       | 0<br>(0%)       | 0<br>(0%)       | 1<br>(14.3%)    | 0<br>(0%)        | 1<br>(14.3%)     | 1<br>(14.3%)     | 0<br>(0%)        |

**All Children: Overall hospitalizations after diagnosis**

**(n, % of outpatient diagnoses)**

|                             |             |               |               |              |              |             |             |             |             |             |             |             |
|-----------------------------|-------------|---------------|---------------|--------------|--------------|-------------|-------------|-------------|-------------|-------------|-------------|-------------|
| Admissions within 0-6 days  | 17<br>(7.9) | 128<br>(10.9) | 216<br>(11.8) | 174<br>(9.1) | 124<br>(6.8) | 77<br>(4.3) | 66<br>(3.2) | 56<br>(2.4) | 65<br>(2.5) | 82<br>(2.8) | 90<br>(2.9) | 82<br>(2.5) |
| Admissions within 0-13 days | 17<br>(7.9) | 129<br>(11.0) | 217<br>(11.9) | 174<br>(9.1) | 125<br>(6.9) | 77<br>(4.3) | 66<br>(3.2) | 56<br>(2.4) | 65<br>(2.5) | 82<br>(2.8) | 90<br>(2.9) | 85<br>(2.6) |
| Admissions within 0-29 days | 17<br>(7.9) | 129<br>(11.0) | 217<br>(11.9) | 174<br>(9.1) | 126<br>(6.9) | 77<br>(4.3) | 67<br>(3.2) | 56<br>(2.4) | 65<br>(2.5) | 82<br>(2.8) | 92<br>(2.9) | 86<br>(2.7) |

**Healthy Children: Overall hospitalizations after diagnosis**

**(n, % of outpatient diagnoses)**

|                             |             |               |               |              |              |             |             |             |             |             |             |             |
|-----------------------------|-------------|---------------|---------------|--------------|--------------|-------------|-------------|-------------|-------------|-------------|-------------|-------------|
| Admissions within 0-6 days  | 16<br>(8.3) | 121<br>(11.1) | 206<br>(12.0) | 163<br>(9.0) | 119<br>(7.0) | 69<br>(4.1) | 61<br>(3.1) | 47<br>(2.2) | 58<br>(2.4) | 70<br>(2.6) | 76<br>(2.6) | 74<br>(2.4) |
| Admissions within 0-13 days | 16<br>(8.3) | 122<br>(11.2) | 207<br>(12.0) | 163<br>(9.0) | 120<br>(7.0) | 69<br>(4.1) | 61<br>(3.1) | 47<br>(2.2) | 58<br>(2.4) | 70<br>(2.6) | 76<br>(2.6) | 77<br>(2.5) |
| Admissions within 0-29 days | 16<br>(8.3) | 122<br>(11.2) | 207<br>(12.0) | 163<br>(9.0) | 121<br>(7.1) | 69<br>(4.1) | 62<br>(3.2) | 47<br>(2.2) | 58<br>(2.4) | 70<br>(2.6) | 77<br>(2.6) | 78<br>(2.6) |

---

*Rounding may create totals slightly over or below 100% in some cases.*

**Supplementary Table 6.** Annual number of cases by month

| Year | Month | RSV - Inpatients |     | Influenza - Inpatients |     | RSV - Outpatients |     | Influenza - Outpatients |       |
|------|-------|------------------|-----|------------------------|-----|-------------------|-----|-------------------------|-------|
|      |       | n                | %   | n                      | %   | n                 | %   | n                       | %     |
| 2011 | 4     | 56               | 0.1 | 36                     | 0.3 | 114               | 0.1 | 954                     | 0.6   |
|      | 5     | 44               | 0.0 | 22                     | 0.2 | 92                | 0.1 | 379                     | 0.2   |
|      | 6     | 60               | 0.1 | 6                      | 0.1 | 103               | 0.1 | 184                     | 0.1   |
|      | 7     | 77               | 0.1 | 1                      | 0.0 | 145               | 0.1 | 50                      | 0.0   |
|      | 8     | 127              | 0.1 | 0                      | 0.0 | 231               | 0.1 | 17                      | 0.0   |
|      | 9     | 178              | 0.2 | 1                      | 0.0 | 398               | 0.2 | 23                      | 0.0   |
|      | 10    | 219              | 0.2 | 0                      | 0.0 | 466               | 0.3 | 54                      | 0.0   |
|      | 11    | 267              | 0.3 | 9                      | 0.1 | 596               | 0.3 | 164                     | 0.1   |
|      | 12    | 451              | 0.5 | 19                     | 0.2 | 845               | 0.5 | 578                     | 0.4   |
|      | 1     | 252              | 0.3 | 74                     | 0.7 | 550               | 0.3 | 1,937                   | 1.3   |
|      | 2     | 124              | 0.1 | 111                    | 1.0 | 276               | 0.2 | 2,752                   | 1.8   |
|      | 3     | 129              | 0.1 | 77                     | 0.7 | 287               | 0.2 | 1,423                   | 0.9   |
| 2012 | 4     | 72               | 0.1 | 40                     | 0.4 | 202               | 0.1 | 747                     | 0.5   |
|      | 5     | 52               | 0.1 | 11                     | 0.1 | 117               | 0.1 | 236                     | 0.2   |
|      | 6     | 80               | 0.1 | 6                      | 0.1 | 164               | 0.1 | 99                      | 0.1   |
|      | 7     | 83               | 0.1 | 4                      | 0.0 | 183               | 0.1 | 114                     | 0.1   |
|      | 8     | 206              | 0.2 | 6                      | 0.1 | 273               | 0.2 | 91                      | 0.1   |
|      | 9     | 354              | 0.4 | 0                      | 0.0 | 1,139             | 0.6 | 74                      | 0.0   |
|      | 10    | 596              | 0.7 | 1                      | 0.0 | 1,430             | 0.8 | 66                      | 0.0   |
|      | 11    | 599              | 0.7 | 4                      | 0.0 | 1,291             | 0.7 | 133                     | 0.1   |
|      | 12    | 699              | 0.8 | 22                     | 0.2 | 1,430             | 0.8 | 499                     | 0.3   |
|      | 1     | 401              | 0.4 | 177                    | 1.6 | 887               | 0.5 | 2,753                   | 1.8   |
|      | 2     | 188              | 0.2 | 154                    | 1.4 | 488               | 0.3 | 2,524                   | 1.6   |
|      | 3     | 191              | 0.2 | 84                     | 0.8 | 461               | 0.3 | 1,275                   | 0.8   |
| 2013 | 4     | 160              | 0.2 | 48                     | 0.4 | 376               | 0.2 | 755                     | 0.5   |
|      | 5     | 132              | 0.1 | 37                     | 0.3 | 297               | 0.2 | 626                     | 0.4   |
|      | 6     | 116              | 0.1 | 7                      | 0.1 | 248               | 0.1 | 139                     | 0.1   |
|      | 7     | 199              | 0.2 | 1                      | 0.0 | 332               | 0.2 | 58                      | 0.0   |
|      | 8     | 372              | 0.4 | 0                      | 0.0 | 660               | 0.4 | 22                      | 0.0   |
|      | 9     | 651              | 0.7 | 1                      | 0.0 | 1,621             | 0.9 | 19                      | 0.0   |
|      | 10    | 743              | 0.8 | 1                      | 0.0 | 1,603             | 0.9 | 62                      | 0.0   |
|      | 11    | 850              | 0.9 | 8                      | 0.1 | 1,733             | 1.0 | 229                     | 0.1   |
|      | 12    | 894              | 1.0 | 36                     | 0.3 | 1,663             | 0.9 | 652                     | 0.4   |
|      | 1     | 542              | 0.6 | 222                    | 2.0 | 1,142             | 0.6 | 2,746                   | 1.8   |
|      | 2     | 285              | 0.3 | 284                    | 2.5 | 679               | 0.4 | 3,870                   | 2.5   |
|      | 2014  | 3                | 232 | 0.3                    | 212 | 1.9               | 607 | 0.3                     | 2,806 |
| 4    |       | 243              | 0.3 | 124                    | 1.1 | 700               | 0.4 | 2,203                   | 1.4   |
| 5    |       | 204              | 0.2 | 43                     | 0.4 | 540               | 0.3 | 846                     | 0.6   |

| Year | Month | RSV - Inpatients |     | Influenza - Inpatients |       | RSV - Outpatients |       | Influenza - Outpatients |       |
|------|-------|------------------|-----|------------------------|-------|-------------------|-------|-------------------------|-------|
|      |       | n                | %   | n                      | %     | n                 | %     | n                       | %     |
| 2015 | 6     | 176              | 0.2 | 9                      | 0.1   | 422               | 0.2   | 240                     | 0.2   |
|      | 7     | 225              | 0.2 | 2                      | 0.0   | 472               | 0.3   | 126                     | 0.1   |
|      | 8     | 379              | 0.4 | 4                      | 0.0   | 689               | 0.4   | 50                      | 0.0   |
|      | 9     | 850              | 0.9 | 1                      | 0.0   | 2,206             | 1.2   | 93                      | 0.1   |
|      | 10    | 937              | 1.0 | 3                      | 0.0   | 1,933             | 1.1   | 140                     | 0.1   |
|      | 11    | 1,405            | 1.6 | 26                     | 0.2   | 2,542             | 1.4   | 504                     | 0.3   |
|      | 12    | 1,781            | 2.0 | 210                    | 1.9   | 3,307             | 1.9   | 3,406                   | 2.2   |
|      | 1     | 794              | 0.9 | 545                    | 4.9   | 1,653             | 0.9   | 8,043                   | 5.2   |
|      | 2     | 467              | 0.5 | 162                    | 1.4   | 1,025             | 0.6   | 2,653                   | 1.7   |
|      | 3     | 433              | 0.5 | 87                     | 0.8   | 1,060             | 0.6   | 1,133                   | 0.7   |
|      | 4     | 406              | 0.4 | 50                     | 0.4   | 1,060             | 0.6   | 850                     | 0.6   |
|      | 2016  | 5                | 218 | 0.2                    | 17    | 0.2               | 593   | 0.3                     | 421   |
| 6    |       | 240              | 0.3 | 7                      | 0.1   | 523               | 0.3   | 178                     | 0.1   |
| 7    |       | 336              | 0.4 | 4                      | 0.0   | 530               | 0.3   | 120                     | 0.1   |
| 8    |       | 555              | 0.6 | 2                      | 0.0   | 913               | 0.5   | 82                      | 0.1   |
| 9    |       | 905              | 1.0 | 6                      | 0.1   | 2,333             | 1.3   | 116                     | 0.1   |
| 10   |       | 1,322            | 1.5 | 10                     | 0.1   | 2,658             | 1.5   | 257                     | 0.2   |
| 11   |       | 1,922            | 2.1 | 22                     | 0.2   | 3,442             | 1.9   | 462                     | 0.3   |
| 12   |       | 2,070            | 2.3 | 43                     | 0.4   | 3,611             | 2.0   | 868                     | 0.6   |
| 1    |       | 874              | 1.0 | 222                    | 2.0   | 1,676             | 0.9   | 3,103                   | 2.0   |
| 2    |       | 401              | 0.4 | 689                    | 6.2   | 943               | 0.5   | 7,554                   | 4.9   |
| 3    |       | 338              | 0.4 | 395                    | 3.5   | 852               | 0.5   | 4,625                   | 3.0   |
| 2017 |       | 4                | 351 | 0.4                    | 158   | 1.4               | 779   | 0.4                     | 2,174 |
|      | 5     | 287              | 0.3 | 34                     | 0.3   | 671               | 0.4   | 610                     | 0.4   |
|      | 6     | 255              | 0.3 | 4                      | 0.0   | 584               | 0.3   | 141                     | 0.1   |
|      | 7     | 475              | 0.5 | 7                      | 0.1   | 838               | 0.5   | 90                      | 0.1   |
|      | 8     | 671              | 0.7 | 3                      | 0.0   | 1,129             | 0.6   | 75                      | 0.0   |
|      | 9     | 1,400            | 1.5 | 4                      | 0.0   | 3,197             | 1.8   | 119                     | 0.1   |
|      | 10    | 1,848            | 2.0 | 24                     | 0.2   | 3,456             | 2.0   | 485                     | 0.3   |
|      | 11    | 1,311            | 1.5 | 45                     | 0.4   | 2,376             | 1.3   | 859                     | 0.6   |
|      | 12    | 997              | 1.1 | 133                    | 1.2   | 1,906             | 1.1   | 2,094                   | 1.4   |
|      | 1     | 518              | 0.6 | 408                    | 3.6   | 1,187             | 0.7   | 4,963                   | 3.2   |
|      | 2     | 299              | 0.3 | 375                    | 3.4   | 820               | 0.5   | 4,666                   | 3.0   |
|      | 3     | 381              | 0.4 | 205                    | 1.8   | 951               | 0.5   | 2,478                   | 1.6   |
| 4    | 484   | 0.5              | 136 | 1.2                    | 1,127 | 0.6               | 1,980 | 1.3                     |       |
| 5    | 509   | 0.6              | 55  | 0.5                    | 1,046 | 0.6               | 1,038 | 0.7                     |       |
| 6    | 557   | 0.6              | 16  | 0.1                    | 1,004 | 0.6               | 351   | 0.2                     |       |
| 7    | 1,071 | 1.2              | 11  | 0.1                    | 1,767 | 1.0               | 319   | 0.2                     |       |
| 8    | 2,434 | 2.7              | 20  | 0.2                    | 4,025 | 2.3               | 356   | 0.2                     |       |



| Year | Month | RSV - Inpatients |     | Influenza - Inpatients |     | RSV - Outpatients |     | Influenza - Outpatients |     |
|------|-------|------------------|-----|------------------------|-----|-------------------|-----|-------------------------|-----|
|      |       | n                | %   | n                      | %   | n                 | %   | n                       | %   |
| 2018 | 9     | 2,781            | 3.1 | 12                     | 0.1 | 5,531             | 3.1 | 431                     | 0.3 |
|      | 10    | 1,692            | 1.9 | 27                     | 0.2 | 3,154             | 1.8 | 491                     | 0.3 |
|      | 11    | 1,031            | 1.1 | 53                     | 0.5 | 1,979             | 1.1 | 825                     | 0.5 |
|      | 12    | 976              | 1.1 | 247                    | 2.2 | 1,818             | 1.0 | 3,546                   | 2.3 |
|      | 1     | 675              | 0.7 | 600                    | 5.4 | 1,464             | 0.8 | 8,322                   | 5.4 |
|      | 2     | 490              | 0.5 | 404                    | 3.6 | 1,118             | 0.6 | 5,553                   | 3.6 |
|      | 3     | 581              | 0.6 | 159                    | 1.4 | 1,210             | 0.7 | 2,203                   | 1.4 |
|      | 4     | 637              | 0.7 | 73                     | 0.7 | 1,288             | 0.7 | 1,109                   | 0.7 |
|      | 5     | 627              | 0.7 | 21                     | 0.2 | 1,217             | 0.7 | 391                     | 0.3 |
|      | 6     | 657              | 0.7 | 14                     | 0.1 | 1,239             | 0.7 | 227                     | 0.1 |
|      | 7     | 1,364            | 1.5 | 8                      | 0.1 | 2,245             | 1.3 | 190                     | 0.1 |
|      | 8     | 2,031            | 2.2 | 8                      | 0.1 | 3,787             | 2.1 | 161                     | 0.1 |
| 2019 | 9     | 2,166            | 2.4 | 6                      | 0.1 | 3,989             | 2.3 | 235                     | 0.2 |
|      | 10    | 1,352            | 1.5 | 14                     | 0.1 | 2,546             | 1.4 | 358                     | 0.2 |
|      | 11    | 732              | 0.8 | 28                     | 0.3 | 1,485             | 0.8 | 490                     | 0.3 |
|      | 12    | 819              | 0.9 | 215                    | 1.9 | 1,526             | 0.9 | 2,432                   | 1.6 |
|      | 1     | 584              | 0.6 | 1,086                  | 9.7 | 1,274             | 0.7 | 11,605                  | 7.6 |
|      | 2     | 530              | 0.6 | 353                    | 3.2 | 1,036             | 0.6 | 3,923                   | 2.6 |
|      | 3     | 673              | 0.7 | 74                     | 0.7 | 1,265             | 0.7 | 1,093                   | 0.7 |
|      | 4     | 821              | 0.9 | 68                     | 0.6 | 1,534             | 0.9 | 1,024                   | 0.7 |
|      | 5     | 597              | 0.7 | 36                     | 0.3 | 1,177             | 0.7 | 706                     | 0.5 |
|      | 6     | 528              | 0.6 | 13                     | 0.1 | 975               | 0.6 | 295                     | 0.2 |
|      | 7     | 1,386            | 1.5 | 12                     | 0.1 | 2,418             | 1.4 | 317                     | 0.2 |
|      | 8     | 2,328            | 2.6 | 13                     | 0.1 | 3,826             | 2.2 | 348                     | 0.2 |
| 2020 | 9     | 2,671            | 3.0 | 51                     | 0.5 | 4,241             | 2.4 | 953                     | 0.6 |
|      | 10    | 1,492            | 1.7 | 48                     | 0.4 | 2,493             | 1.4 | 707                     | 0.5 |
|      | 11    | 731              | 0.8 | 92                     | 0.8 | 1,384             | 0.8 | 915                     | 0.6 |
|      | 12    | 662              | 0.7 | 547                    | 4.9 | 1,322             | 0.7 | 4,537                   | 3.0 |
|      | 1     | 410              | 0.5 | 663                    | 5.9 | 971               | 0.5 | 5,536                   | 3.6 |
|      | 2     | 355              | 0.4 | 153                    | 1.4 | 799               | 0.5 | 1,452                   | 0.9 |
|      | 3     | 276              | 0.3 | 26                     | 0.2 | 634               | 0.4 | 431                     | 0.3 |
|      | 4     | 140              | 0.2 | 6                      | 0.1 | 361               | 0.2 | 136                     | 0.1 |
|      | 5     | 27               | 0.0 | 1                      | 0.0 | 112               | 0.1 | 33                      | 0.0 |
|      | 6     | 29               | 0.0 | 0                      | 0.0 | 231               | 0.1 | 33                      | 0.0 |
|      | 7     | 68               | 0.1 | 0                      | 0.0 | 697               | 0.4 | 27                      | 0.0 |
|      | 8     | 59               | 0.1 | 0                      | 0.0 | 649               | 0.4 | 22                      | 0.0 |
| 9    | 106   | 0.1              | 1   | 0.0                    | 592 | 0.3               | 29  | 0.0                     |     |
| 10   | 159   | 0.2              | 0   | 0.0                    | 607 | 0.3               | 53  | 0.0                     |     |
| 11   | 172   | 0.2              | 0   | 0.0                    | 521 | 0.3               | 91  | 0.1                     |     |

| Year | Month | RSV - Inpatients |     | Influenza - Inpatients |       | RSV - Outpatients |     | Influenza - Outpatients |     |
|------|-------|------------------|-----|------------------------|-------|-------------------|-----|-------------------------|-----|
|      |       | n                | %   | n                      | %     | n                 | %   | n                       | %   |
| 2021 | 12    | 182              | 0.2 | 1                      | 0.0   | 487               | 0.3 | 123                     | 0.1 |
|      | 1     | 163              | 0.2 | 1                      | 0.0   | 434               | 0.2 | 104                     | 0.1 |
|      | 2     | 228              | 0.3 | 1                      | 0.0   | 417               | 0.2 | 88                      | 0.1 |
|      | 3     | 465              | 0.5 | 1                      | 0.0   | 621               | 0.4 | 106                     | 0.1 |
|      | 4     | 933              | 1.0 | 1                      | 0.0   | 1,265             | 0.7 | 137                     | 0.1 |
|      | 5     | 1,537            | 1.7 | 0                      | 0.0   | 2,163             | 1.2 | 141                     | 0.1 |
|      | 6     | 2,348            | 2.6 | 0                      | 0.0   | 3,881             | 2.2 | 144                     | 0.1 |
|      | 7     | 3,135            | 3.5 | 0                      | 0.0   | 5,560             | 3.1 | 108                     | 0.1 |
|      | 8     | 1,884            | 2.1 | 0                      | 0.0   | 3,451             | 2.0 | 65                      | 0.0 |
|      | 9     | 772              | 0.9 | 0                      | 0.0   | 1,369             | 0.8 | 37                      | 0.0 |
|      | 10    | 326              | 0.4 | 0                      | 0.0   | 726               | 0.4 | 29                      | 0.0 |
|      | 11    | 228              | 0.3 | 1                      | 0.0   | 563               | 0.3 | 47                      | 0.0 |
| 2022 | 12    | 377              | 0.4 | 1                      | 0.0   | 671               | 0.4 | 95                      | 0.1 |
|      | 1     | 330              | 0.4 | 2                      | 0.0   | 588               | 0.3 | 184                     | 0.1 |
|      | 2     | 160              | 0.2 | 0                      | 0.0   | 373               | 0.2 | 149                     | 0.1 |
|      | 3     | 145              | 0.2 | 0                      | 0.0   | 280               | 0.2 | 132                     | 0.1 |
|      | 4     | 81               | 0.1 | 0                      | 0.0   | 213               | 0.1 | 108                     | 0.1 |
|      | 5     | 155              | 0.2 | 0                      | 0.0   | 437               | 0.2 | 82                      | 0.1 |
|      | 6     | 404              | 0.4 | 0                      | 0.0   | 745               | 0.4 | 60                      | 0.0 |
| 7    | 1,135 | 1.3              | 2   | 0.0                    | 2,277 | 1.3               | 233 | 0.2                     |     |

**Supplementary Table 7.** Baseline characteristics of children <5 years of age who are hospitalized with RSV infection by age group and COVID-19 era

|                               | Age <6 months                                                                              |                        |                  | Age 6-11 months      |                        |                   | Age 1-<2- years      |                        |                     | Age 2-<5 years       |                        |                     |
|-------------------------------|--------------------------------------------------------------------------------------------|------------------------|------------------|----------------------|------------------------|-------------------|----------------------|------------------------|---------------------|----------------------|------------------------|---------------------|
|                               | Pre-<br>COVID-<br>19                                                                       | During<br>COVID-<br>19 | 2021<br>season   | Pre-<br>COVID-<br>19 | During<br>COVID-<br>19 | 2021<br>season    | Pre-<br>COVID-<br>19 | During<br>COVID-<br>19 | 2021<br>season      | Pre-<br>COVID-<br>19 | During<br>COVID-<br>19 | 2021<br>season      |
|                               | <b>Total number of patients per age group per time period, n (relative % by age group)</b> | 14,877<br>(39.3)       | 6,106<br>(36.4)  | 4,456<br>(35.9)      | 8,311<br>(21.9)        | 2,536<br>(15.1)   | 1,771<br>(14.3)      | 10,142<br>(26.8)       | 4,574<br>(27.2)     | 3,438<br>(27.7)      | 4,537<br>(12.0)        | 3,573<br>(21.3)     |
| <b>Sex, n (%)</b>             |                                                                                            |                        |                  |                      |                        |                   |                      |                        |                     |                      |                        |                     |
| Female                        | 6,501<br>(43.7)                                                                            | 2,760<br>(45.2)        | 2,023<br>(45.4)  | 3,518<br>(42.3)      | 1,067<br>(42.1)        | 732<br>(41.3)     | 4,775<br>(47.1)      | 2,074<br>(45.3)        | 1,582<br>(46.0)     | 2,228<br>(49.1)      | 1,813<br>(50.7)        | 1,396<br>(51.1)     |
| Male                          | 8,376<br>(56.3)                                                                            | 3,346<br>(54.8)        | 2,433<br>(54.6)  | 4,793<br>(57.7)      | 1,469<br>(57.9)        | 1,039<br>(58.7)   | 5,367<br>(52.9)      | 2,500<br>(54.7)        | 1,856<br>(54.0)     | 2,309<br>(50.9)      | 1,760<br>(49.3)        | 1,335<br>(48.9)     |
| <b>Age, months</b>            |                                                                                            |                        |                  |                      |                        |                   |                      |                        |                     |                      |                        |                     |
| <b>Mean (SD)</b>              | 2.6 (1.4)                                                                                  | 2.4 (1.4)              | 2.3 (1.4)        | 8.4 (1.7)            | 8.5 (1.7)              | 8.4 (1.7)         | 16.5 (3.3)           | 17.3 (3.4)             | 17.4 (3.4)          | 33.7 (8.5)           | 34.0 (8.8)             | 33.8 (8.7)          |
| <b>Median (IQR)</b>           | 2.0<br>(1.0-4.0)                                                                           | 2.0<br>(1.0-3.0)       | 2.0<br>(1.0-3.0) | 8.0<br>(7.0-10.0)    | 8.0<br>(7.0-10.0)      | 8.0<br>(7.0-10.0) | 16.0<br>(14.0-19.0)  | 17.0<br>(14.0-20.0)    | 17.0<br>(15.0-20.0) | 31.0<br>(27.0-39.0)  | 31.0<br>(27.0-39.0)    | 31.0<br>(27.0-39.0) |
| <b>Season by year, n (%)</b>  |                                                                                            |                        |                  |                      |                        |                   |                      |                        |                     |                      |                        |                     |
| 2016 (May 2016 to April 2017) | 758<br>(5.1)                                                                               | 0<br>(0.0)             | 0<br>(0.0)       | 425<br>(5.1)         | 0<br>(0.0)             | 0<br>(0.0)        | 353<br>(3.5)         | 0<br>(0.0)             | 0<br>(0.0)          | 146<br>(3.2)         | 0<br>(0.0)             | 0<br>(0.0)          |
| 2017 (May 2017 to April 2018) | 5,148<br>(34.6)                                                                            | 0<br>(0.0)             | 0<br>(0.0)       | 2,987<br>(35.9)      | 0<br>(0.0)             | 0<br>(0.0)        | 3,588<br>(35.4)      | 0<br>(0.0)             | 0<br>(0.0)          | 1,711<br>(37.7)      | 0<br>(0.0)             | 0<br>(0.0)          |
| 2018 (May 2018 to April 2019) | 5,105<br>(34.3)                                                                            | 0<br>(0.0)             | 0<br>(0.0)       | 2,754<br>(33.1)      | 0<br>(0.0)             | 0<br>(0.0)        | 3,148<br>(31.0)      | 0<br>(0.0)             | 0<br>(0.0)          | 1,349<br>(29.7)      | 0<br>(0.0)             | 0<br>(0.0)          |
| 2019 (May 2019 to April 2020) | 3,866<br>(26.0)                                                                            | 514<br>(8.4)           | 0<br>(0.0)       | 2,145<br>(25.8)      | 237<br>(9.3)           | 0<br>(0.0)        | 3,053<br>(30.1)      | 260<br>(5.7)           | 0<br>(0.0)          | 1,331<br>(29.3)      | 170<br>(4.8)           | 0<br>(0.0)          |
| 2020 (May to December)        | 0                                                                                          | 304                    | 0                | 0                    | 166                    | 0                 | 0                    | 238                    | 0                   | 0                    | 94                     | 0                   |



|                                             |        |        |        |        |        |        |        |        |        |        |        |        |
|---------------------------------------------|--------|--------|--------|--------|--------|--------|--------|--------|--------|--------|--------|--------|
|                                             | (0.0)  | (0.0)  | (0.0)  | (0.0)  | (0.0)  | (0.0)  | (0.0)  | (0.0)  | (0.0)  | (0.0)  | (0.0)  | (0.0)  |
| No record of these comorbidities            | 5,782  | 4,263  | 7,815  | 2,391  | 1,675  | 9,869  | 4,475  | 3,361  | 4,389  | 3,479  | 2,655  | 5,782  |
|                                             | (94.7) | (95.7) | (94.0) | (94.3) | (94.6) | (97.3) | (97.8) | (97.8) | (96.7) | (97.4) | (97.2) | (94.7) |
| <b>Palivizumab use, n (%)</b>               |        |        |        |        |        |        |        |        |        |        |        |        |
| Yes                                         | 343    | 95     | 47     | 211    | 59     | 38     | 174    | 52     | 37     | 15     | 13     | 9      |
|                                             | (2.3)  | (1.6)  | (1.1)  | (2.5)  | (2.3)  | (2.1)  | (1.7)  | (1.1)  | (1.1)  | (0.3)  | (0.4)  | (0.3)  |
| No record of use                            | 14,534 | 6,011  | 4,409  | 8,100  | 2,477  | 1,733  | 9,968  | 4,522  | 3,401  | 4,522  | 3,560  | 2,722  |
|                                             | (97.7) | (98.4) | (98.9) | (97.5) | (97.7) | (97.9) | (98.3) | (98.9) | (98.9) | (99.7) | (99.6) | (99.7) |
| <b>Size of healthcare facilities, n (%)</b> |        |        |        |        |        |        |        |        |        |        |        |        |
| Less than 200 beds                          | 679    | 358    | 255    | 489    | 196    | 132    | 524    | 350    | 254    | 240    | 302    | 242    |
|                                             | (4.6)  | (5.9)  | (5.7)  | (5.9)  | (7.7)  | (7.5)  | (5.2)  | (7.7)  | (7.4)  | (5.3)  | (8.5)  | (8.9)  |
| 200 to 499 beds                             | 8,137  | 3,296  | 2,395  | 4,930  | 1,501  | 1,028  | 5,994  | 2,599  | 1,962  | 2,595  | 1,982  | 1,520  |
|                                             | (54.7) | (54.0) | (53.7) | (59.3) | (59.2) | (58.0) | (59.1) | (56.8) | (57.1) | (57.2) | (55.5) | (55.7) |
| 500 or more beds                            | 6,061  | 2,452  | 1,806  | 2,892  | 839    | 611    | 3,624  | 1,625  | 1,222  | 1,702  | 1,289  | 969    |
|                                             | (40.7) | (40.2) | (40.5) | (34.8) | (33.1) | (34.5) | (35.7) | (35.5) | (35.5) | (37.5) | (36.1) | (35.5) |

*Rounding may create totals slightly over or below 100% in some cases.*

**Supplementary Table 8.** Baseline characteristics of children <5 years of age who are hospitalized with influenza in Japan by age group and COVID-19 era

|                                                                                            | Age <6 months        |                        |                  | Age 6-11 months      |                        |                     | Age 1-<2- years      |                        |                     | Age 2-<5 years       |                        |                     |
|--------------------------------------------------------------------------------------------|----------------------|------------------------|------------------|----------------------|------------------------|---------------------|----------------------|------------------------|---------------------|----------------------|------------------------|---------------------|
|                                                                                            | Pre-<br>COVID-<br>19 | During<br>COVID-<br>19 | 2021<br>season   | Pre-<br>COVID-<br>19 | During<br>COVID-<br>19 | 2021<br>season      | Pre-<br>COVID-<br>19 | During<br>COVID-<br>19 | 2021<br>season      | Pre-<br>COVID-<br>19 | During<br>COVID-<br>19 | 2021<br>season      |
| <b>Total number of patients per age group per time period, n (relative % by age group)</b> | 1,125<br>(20.4)      | 155<br>(18.0)          | 1<br>(16.7)      | 568<br>(10.3)        | 97<br>(11.3)           | 1<br>(16.7)         | 1,384<br>(25.1)      | 275<br>(31.9)          | 3<br>(50.0)         | 2,431<br>(44.1)      | 334<br>(38.8)          | 1<br>(16.7)         |
| <b>Sex, n (%)</b>                                                                          |                      |                        |                  |                      |                        |                     |                      |                        |                     |                      |                        |                     |
| Female                                                                                     | 528<br>(46.9)        | 63<br>(40.6)           | 1<br>(100)       | 260<br>(45.8)        | 38<br>(39.2)           | 1<br>(100)          | 620<br>(44.8)        | 118<br>(42.9)          | 0<br>(0.0)          | 1,035<br>(42.6)      | 126<br>(37.7)          | 0<br>(0.0)          |
| Male                                                                                       | 597<br>(53.1)        | 92<br>(59.4)           | 0<br>(0.0)       | 308<br>(54.2)        | 59<br>(60.8)           | 0<br>(0.0)          | 764<br>(55.2)        | 157<br>(57.1)          | 3<br>(100)          | 1,396<br>(57.4)      | 208<br>(62.3)          | 1<br>(100)          |
| <b>Age, months</b>                                                                         |                      |                        |                  |                      |                        |                     |                      |                        |                     |                      |                        |                     |
| <b>Mean (SD)</b>                                                                           | 2.6 (1.2)            | 2.6 (1.3)              | 0.0 (.)          | 8.6 (1.7)            | 8.5 (1.7)              | 10.0 (.)            | 17.3 (3.4)           | 17.3 (3.3)             | 19.0 (1.7)          | 40.2 (10.6)          | 40.3 (10.6)            | 27.0 (.)            |
| <b>Median (IQR)</b>                                                                        | 2.0<br>(2.0-3.0)     | 3.0<br>(2.0-4.0)       | 0.0<br>(0.0-0.0) | 9.0<br>(7.0-10.0)    | 9.0<br>(7.0-10.0)      | 10.0<br>(10.0-10.0) | 17.0<br>(14.0-20.0)  | 17.0<br>(14.0-20.0)    | 20.0<br>(17.0-20.0) | 40.0<br>(31.0-49.0)  | 40.0<br>(31.0-49.0)    | 27.0<br>(27.0-27.0) |
| <b>Season by year, n (%)</b>                                                               |                      |                        |                  |                      |                        |                     |                      |                        |                     |                      |                        |                     |
| 2016 (May 2016 to April 2017)                                                              | 255<br>(22.7)        | 0<br>(0.0)             | 0<br>(0.0)       | 108<br>(19.0)        | 0<br>(0.0)             | 0<br>(0.0)          | 276<br>(19.9)        | 0<br>(0.0)             | 0<br>(0.0)          | 485<br>(20.0)        | 0<br>(0.0)             | 0<br>(0.0)          |
| 2017 (May 2017 to April 2018)                                                              | 303<br>(26.9)        | 0<br>(0.0)             | 0<br>(0.0)       | 174<br>(30.6)        | 0<br>(0.0)             | 0<br>(0.0)          | 396<br>(28.6)        | 0<br>(0.0)             | 0<br>(0.0)          | 804<br>(33.1)        | 0<br>(0.0)             | 0<br>(0.0)          |
| 2018 (May 2018 to April 2019)                                                              | 423<br>(37.6)        | 0<br>(0.0)             | 0<br>(0.0)       | 186<br>(32.7)        | 0<br>(0.0)             | 0<br>(0.0)          | 490<br>(35.4)        | 0<br>(0.0)             | 0<br>(0.0)          | 796<br>(32.7)        | 0<br>(0.0)             | 0<br>(0.0)          |
| 2019 (May 2019 to April 2020)                                                              | 144<br>(12.8)        | 152<br>(98.1)          | 0<br>(0.0)       | 100<br>(17.6)        | 94<br>(96.9)           | 0<br>(0.0)          | 222<br>(16.0)        | 269<br>(97.8)          | 0<br>(0.0)          | 346<br>(14.2)        | 333<br>(99.7)          | 0<br>(0.0)          |

|                                                  |       |       |       |       |       |       |       |       |       |       |       |       |
|--------------------------------------------------|-------|-------|-------|-------|-------|-------|-------|-------|-------|-------|-------|-------|
| 2020 (May to December)                           | 0     | 1     | 0     | 0     | 2     | 0     | 0     | 0     | 0     | 0     | 0     | 0     |
|                                                  | (0.0) | (0.6) | (0.0) | (0.0) | (2.1) | (0.0) | (0.0) | (0.0) | (0.0) | (0.0) | (0.0) | (0.0) |
| 2021 (January to December)                       | 0     | 1     | 1     | 0     | 1     | 1     | 0     | 3     | 3     | 0     | 1     | 1     |
|                                                  | (0.0) | (0.6) | (100) | (0.0) | (1.0) | (100) | (0.0) | (1.1) | (100) | (0.0) | (0.3) | (100) |
| 2022 (January to July)                           | 0     | 1     | 0     | 0     | 0     | 0     | 0     | 3     | 0     | 0     | 0     | 0     |
|                                                  | (0.0) | (0.6) | (0.0) | (0.0) | (0.0) | (0.0) | (0.0) | (1.1) | (0.0) | (0.0) | (0.0) | (0.0) |
| <b>Comorbidity during baseline period, n (%)</b> |       |       |       |       |       |       |       |       |       |       |       |       |
| Down syndrome                                    | 1     | 1     | 0     | 1     | 1     | 0     | 0     | 0     | 0     | 4     | 0     | 0     |
|                                                  | (0.1) | (0.6) | (0.0) | (0.2) | (1.0) | (0.0) | (0.0) | (0.0) | (0.0) | (0.2) | (0.0) | (0.0) |
| Congenital heart disease                         | 23    | 1     | 0     | 16    | 4     | 0     | 13    | 2     | 0     | 8     | 1     | 0     |
|                                                  | (2.0) | (0.6) | (0.0) | (2.8) | (4.1) | (0.0) | (0.9) | (0.7) | (0.0) | (0.3) | (0.3) | (0.0) |
| Bronchopulmonary dysplasia                       | 1     | 0     | 0     | 1     | 0     | 0     | 1     | 0     | 0     | 0     | 0     | 0     |
|                                                  | (0.1) | (0.0) | (0.0) | (0.2) | (0.0) | (0.0) | (0.1) | (0.0) | (0.0) | (0.0) | (0.0) | (0.0) |
| Prematurity                                      | 19    | 3     | 0     | 16    | 6     | 0     | 1     | 1     | 0     | 1     | 0     | 0     |
|                                                  | (1.7) | (1.9) | (0.0) | (2.8) | (6.2) | (0.0) | (0.1) | (0.4) | (0.0) | (0.0) | (0.0) | (0.0) |
| Immunodeficiency                                 | 1     | 0     | 0     | 4     | 1     | 0     | 3     | 1     | 0     | 8     | 0     | 0     |
|                                                  | (0.1) | (0.0) | (0.0) | (0.7) | (1.0) | (0.0) | (0.2) | (0.4) | (0.0) | (0.3) | (0.0) | (0.0) |
| Pulmonary hypoplasia                             | 0     | 1     | 0     | 0     | 0     | 0     | 0     | 0     | 0     | 0     | 0     | 0     |
|                                                  | (0.0) | (0.6) | (0.0) | (0.0) | (0.0) | (0.0) | (0.0) | (0.0) | (0.0) | (0.0) | (0.0) | (0.0) |
| Airway stenosis                                  | 0     | 0     | 0     | 0     | 0     | 0     | 1     | 1     | 0     | 0     | 0     | 0     |
|                                                  | (0.0) | (0.0) | (0.0) | (0.0) | (0.0) | (0.0) | (0.1) | (0.4) | (0.0) | (0.0) | (0.0) | (0.0) |
| Esophageal atresia                               | 0     | 0     | 0     | 0     | 0     | 0     | 0     | 0     | 0     | 0     | 0     | 0     |
|                                                  | (0.0) | (0.0) | (0.0) | (0.0) | (0.0) | (0.0) | (0.0) | (0.0) | (0.0) | (0.0) | (0.0) | (0.0) |
| Congenital metabolic disorder                    | 1     | 0     | 0     | 4     | 0     | 0     | 11    | 2     | 0     | 25    | 0     | 0     |
|                                                  | (0.1) | (0.0) | (0.0) | (0.7) | (0.0) | (0.0) | (0.8) | (0.7) | (0.0) | (1.0) | (0.0) | (0.0) |
| Neuromuscular disorder                           | 0     | 0     | 0     | 5     | 3     | 0     | 17    | 2     | 0     | 28    | 1     | 0     |
|                                                  | (0.0) | (0.0) | (0.0) | (0.9) | (3.1) | (0.0) | (1.2) | (0.7) | (0.0) | (1.2) | (0.3) | (0.0) |

|                                              |        |        |         |         |        |         |        |        |         |        |        |         |
|----------------------------------------------|--------|--------|---------|---------|--------|---------|--------|--------|---------|--------|--------|---------|
| Cystic fibrosis                              | 0      | 0      | 0       | 0       | 0      | 0       | 0      | 0      | 0       | 0      | 0      | 0       |
|                                              | (0.0)  | (0.0)  | (0.0)   | (0.0)   | (0.0)  | (0.0)   | (0.0)  | (0.0)  | (0.0)   | (0.0)  | (0.0)  | (0.0)   |
| No record of these comorbidities             | 1,082  | 150    | 1       | 529     | 85     | 1       | 1,339  | 269    | 3       | 2,367  | 332    | 1       |
|                                              | (96.2) | (96.8) | (100.0) | (93.1)  | (87.6) | (100.0) | (96.7) | (97.8) | (100.0) | (97.4) | (99.4) | (100.0) |
| <b>Palivizumab use, n (%)</b>                |        |        |         |         |        |         |        |        |         |        |        |         |
| Yes                                          | 11     | 2      | 0       | 15      | 5      | 0       | 17     | 1      | 0       | 2      | 1      | 0       |
|                                              | (1.0)  | (1.3)  | (0.0)   | (2.6)   | (5.2)  | (0.0)   | (1.2)  | (0.4)  | (0.0)   | (0.1)  | (0.3)  | (0.0)   |
| No record of use                             | 1,114  | 153    | 1       | 553     | 92     | 1       | 1,367  | 274    | 3       | 2,429  | 333    | 1       |
|                                              | (99.0) | (98.7) | (100)   | (97.4)  | (94.8) | (100)   | (98.8) | (99.6) | (100)   | (99.9) | (99.7) | (100)   |
| <b>Size of healthcare institution, n (%)</b> |        |        |         |         |        |         |        |        |         |        |        |         |
| Less than 200 beds                           | 35     | 2      | 0       | 19      | 1      | 0       | 71     | 14     | 0       | 93     | 13     | 0       |
|                                              | (3.1)  | (1.3)  | (0.0)   | (3.3)   | (1.0)  | (0.0)   | (5.1)  | (5.1)  | (0.0)   | (3.8)  | (3.9)  | (0.0)   |
| 200 to 499 beds                              | 595    | 76     | 1       | 299     | 52     | 1       | 776    | 143    | 2       | 1,330  | 175    | 1       |
|                                              | (52.9) | (49.0) | (100)   | (52.6)  | (53.6) | (100)   | (56.1) | (52.0) | (66.7)  | (54.7) | (52.4) | (100)   |
| 500 or more beds                             | 495    | 77     | 0       | 250     | 44     | 0       | 537    | 118    | 1       | 1,008  | 146    | 0       |
|                                              | (44.0) | (49.7) | (0.0)   | (44.0.) | (45.4) | (0.0)   | (38.8) | (42.9) | (33.3)  | (41.5) | (43.7) | (0.0)   |

*Rounding may create totals slightly over or below 100% in some cases.*
